# Supplementary material for: Dimensionless evaluation and kinetics of rapid and ultradeep desulfurization of diesel fuel in an oscillatory baffled reactor
Source: Royal Society of Chemistry journal article supplement (doi:10.1039/d2ra01663j), 2022-01-01
Supplement: d2ra01663j1.pdf [file d2ra01663j1.pdf]

**Table S1.** Physical properties of the diesel fuel.

| Physical property                               | value  | Physical property          | value |
|-------------------------------------------------|--------|----------------------------|-------|
| Specific gravity@15.5°C                         | 0.8333 | Colour                     | 0.9   |
| API at 60F                                      | 38.31  | Initial boiling point (°C) | 165   |
| Total sulfur, (ppm)                             | 9      | Distillation, (°C)         |       |
| Kinematic viscosity@40°C (mm <sup>2</sup> /sec) | 3.15   | 10%                        | 202   |
| Cetane Index                                    | 53.9   | 50%                        | 276   |
| Flash point, (°C)                               | 61     | 90%                        | 338   |
| Pour point, (°C)                                | < - 20 | Final boiling point (°C)   | 357   |

**Table S2.** Specifications of DBT and hydrogen peroxide.

| Properties       | DBT                              | Hydrogen peroxide             |
|------------------|----------------------------------|-------------------------------|
| Chemical formula | C <sub>12</sub> H <sub>8</sub> S | H <sub>2</sub> O <sub>2</sub> |
| Molecular weight | 184.25                           | Liquid                        |
| Physical form    | Solid                            | 21.11                         |
| Purity           | 98 %                             | 9.0 – 31.0 %                  |
